# Supplementary material for: T cell receptor γδ is a critical, real-time determinant of unique tissue surveillance mechanisms
Source: Research Square preprint supplement (doi:10.21203/rs.3.rs-6803702/v1), 2025-06-24
Supplement: Supplementary file 1 [file 41175566b5ed1487f4356ff1.docx]

Supplementary Table 1:

Differentially expressed proteins from low input proteomic analysis in epidermal γδX cells.

| Protein ID | WT 1 | WT 2 | WT 3 | KO 1 | KO 2 | KO 3 | WT mean | KO mean | FC | Log2FC | pValue |
| --- | --- | --- | --- | --- | --- | --- | --- | --- | --- | --- | --- |
| TRGC1 | 808.209 | 700.322 | 747.643 | 205.471 | 345.572 | 282.144 | 752.058 | 277.729 | 0.369 | -1.467 | 0.00042 |
| TRDC | 311.067 | 402.464 | 358.499 | 180.783 | 229.122 | 203.219 | 357.344 | 204.374 | 0.572 | -0.805 | 0.00199 |
| TRDV4 | 92.540 | 80.892 | 95.539 | 68.592 | 71.215 | 61.080 | 89.657 | 66.962 | 0.747 | -0.420 | 0.01643 |
| CD3G | 181.226 | 256.072 | 260.918 | 178.153 | 159.366 | 126.491 | 232.738 | 154.670 | 0.665 | -0.584 | 0.03075 |

WT: wild-type (γδTCR) sample; KO: knock-out (γδX) sample; FC: Fold Change.
