# Supplementary material for: T cell receptor γδ is a critical, real-time determinant of unique tissue surveillance mechanisms
Source: Research Square preprint supplement (doi:10.21203/rs.3.rs-6803702/v1), 2025-06-24
Supplement: Supplementary file 2 [file 8966ba432ab220ed5bb98850.docx]

### **Resource availability**

#### **Lead contact**

Further information and requests for resources and reagents should be directed to and will be fulfilled by the lead contacts (A.C.H. & M.M.R.).

#### **Materials availability**

Mouse lines generated in this study will be maintained in the lead authors’ (A.C.H.’s and M.M.R.’s) current institute’s animal house and/or stored locally as frozen embryos and can be made available on request.

#### **Data and code availability**

### Raw and processed data for the mouse RNA-sequencing (RNA-seq) and Assay for Transposase-Accessible Chromatin using sequencing (ATAC-seq) data generated in this paper are available at NCBI’s Gene Expression Omnibus (GEO) repository under the accession identifiers GSE277902 and GSE277903 respectively. Human RNA-seq data generated in this paper is available at GEO repository under the accession identifier GSE297713.

### **Experimental model and subject details**

#### **Generation of a floxed Trgc1 knock out mouse model**

Two guide RNAs (sgRNAs) were designed, one to a predicted cut at site chr13:19297741 upstream of exon 1 (5'-GTATATAGTCATTCGTGTAA-3') and one to a predicted cut at site chr13:19401356 (5'-CTTAAATCACAGAACTCGGG-3'). Two ssODN containing the LoxP sites were designed with 50-60bp of homology either side, were synthesised by IDT (Table 1). C57BL/6J zygotes were electroporated with 50 uL of Cas9 protein/3’-sgRNA/3’ LoxP ssODN (1.2 uM/6 uM/8 uM using a Nepa21 electroporator (Sonidel)1. Founder mice were initially screened by qPCR (Table 2) and a single founder mouse with a perfect integration of the 3’ loxP sequence was confirmed by long-range PCR (Table 2) and sequencing of nested PCR amplicons (Table 2) using Illumina MiSeq 250 bp paired-end reads. Zygotes harbouring this 3’ loxP allele were generated by in vitro fertilization and were subsequently electroporated with 5’ sgRNA/5’ LoxP ssODN/Cas9 protein as previously. The resulting mice were screened by qPCR and a founder mouse was generated which was positive for both LoxP sites. The correct integration of both 5’ and 3’ loxP sequences was confirmed by Illumina MiSeq sequencing, and the founder was bred with C57BL6/J, resulting in 5 F1 mice harbouring the floxed allele.

**Table 1 – ssODN Sequences**

| 5’-loxP | AATAAAGCAATGGGCACATTGTCCAAACCACAGCAGAAACATGGAAGGATAATTCCTTTAATAACTTCGTATAGCATACATTATACGAAGTTATCACGAATGACTATATACACGTACAAAAAAAAAAATAAAAGCTACTTACATCTATTTCACC |
| --- | --- |
| 3’-loxP | ACACATTCCTGTGCCAGGCGTGGTGGCATCTGCCTTAAATCACAGAACTCATAACTTCGTATAGCATACATTATACGAAGTTATGGGAGGCAGAGGCAGGGAGATTTCTGAGTTGAGGCCAGCCTGGTCTACAA |

**Table 2 – Primer/Probe Sequences**

| In-house primers |  |
| --- | --- |
| LR-F/5’-LoxP MiSeq Forward | TGCTGTGAACAAGTCTGAGCT |
| 5’-LoxP MiSeq Reverse | CCCTGTCCCCCATGTGTTAC |
| 3’-LoxP MiSeq Forward | TGTCATGGTATTCGGTGACAGT |
| LR-R/3’-LoxP MiSeq Reverse | TGATCAGGGGTTGCTTGGTG |
| Transnetyx Primer probe sets |  |
| Tcrg 5loxP-2 Fl Forward | CCACAGCAGAAACATGGAAGGATAATT |
| Tcrg 5loxP-2 Fl Probe | ATACATTATACGAAGTTATCACGA |
| Tcrg 5loxP-2 Fl Reverse | CATTTAGCTGATGCTACAATGAGCTCTG |
| Tcrg 5loxP-2 WT Forward | GCACATTGTCCAAACCACAGCA |
| Tcrg 5loxP-2 WT Probe | TCATTCGTGTAAAGGAA |
| Tcrg 5loxP-2 WT Reverse | GCTACAATGAGCTCTGCATTTCTTATATCTC |
| Tcrg 3loxP Fl Forward | GGCATCTGCCTTAAATCACAGAACT |
| Tcrg 3loxP Fl Probe | ATACATTATACGAAGTTATGGGAG |
| Tcrg 3loxP Fl Reverse | CTGGCCTCAACTCAGAAATCTCC |
| Tcrg 3loxP WT Forward | GTCATGGTATTCGGTGACAGTAACAAGAG |
| Tcrg 3loxP WT Probe | CTCCCGAGTTCTGTGAT |
| Tcrg 3loxP WT Reverse | CTGGCCTCAACTCAGAAATCTCC |
| Tcrg-WT Forward | GCCAAATAATGGGCATATTAACAAGTTCT |
| Tcrg-WT Probe | CTTTTAGTTGCTGTGAGT |
| Tcrg-WT Reverse | CCAGCAAGTTGTAGGCTTGGT |

#### **Mice**

Adult male mice were used at 6-24 weeks of age. Mice were bred at the Francis Crick Institute (London, United Kingdom). C57BL/6J background: *TCRCg1-/-, TcrdCreERT//TCRCg1flox*, Rosa26*CreERT//TCRCg1flox, TcrdCreERT//TCRCg1flox//Rosa26-mTmGflox* (This mouse strain is the intercross of TcrdCreERT and Rosa26-mTmGflox. This enables the gd T cell-specific expression of EGFP after tamoxifen administration.)

Mice were kept in filter-topped cages with sterilized food and water ad libitum and autoclaved corncob bedding that was changed at least once weekly. All experiments were performed according to the UK animal protection laws.

**Table 3. Key resources**

| **Reagent or resource** | **Source** | **Identifier** |
| --- | --- | --- |
| Antibodies | | |
| FITC anti-mouse I-A/I-E (2G9) | BD Biosciences | Cat. # 553623, RRID: AB_394958 |
| FITC anti-mouse CD19 (6D5) | BioLegend | Cat. # 115505, RRID: AB_313640 |
| FITC anti-mouse F4/80 (BM8) | eBioscience | Cat. # 11-4801-82, RRID: AB_2637191 |
| FITC anti-mouse H57-597 (TCRβ) | eBioscience | Cat. # 11-5961-85, RRID: AB_465329 |
| APC anti-mouse CD103 (2E7) | BioLegend | Cat. # 121413, RRID: AB_1227503 |
| PE anti-mouse CD103 (2E8) | BioLegend | Cat. # 121406, RRID: AB_1133989 |
| FITC anti-mouse TCR Vγ1.1/Cr4 [2.11] | BioLegend | Cat. # 141104, RRID: AB_10697031 |
| APC anti-mouse TCR Vγ5 (536) | BioLegend | Cat. # 137506, RRID: AB_10898113 |
| AF647 anti-mouse TCR Vγ7 | In house |  |
| APC anti-mouse TCR Vγ4 (49.2) | BioLegend | Cat. # 160608, RRID: AB_3683175 |
| APC anti-mouse TCR Vγ1.1/Cr4 (2.11) |  | Cat. # 141108, RRID: AB_10901177 |
| PerCP-Cy5.5- Anti-mouse IL-17A (TC11-18H10.1) | BioLegend | Cat. # 506919, RRID: AB_469456 |
| PE/Cy7 anti-mouse IFN-γ [XMG1.2] | BioLegend | Cat. # 505825, RRID: AB_1595591 |
| APC Annexin V | BioLegend | Cat. # 640941, RRID: AB_2616657 |
| PE anti-human CD95 (Fas) | BioLegend | Cat. # 305607, RRID: AB_314545 |
| PE/Cy7 anti-mouse CD69 (H1.2F3) | BioLegend | Cat. # 104512, RRID: AB_493564 |
| APC/Cy7 anti-mouse CD69 (H1.2F3) | BioLegend | Cat. # 104526, RRID: AB_10679041 |
| PE/Cy7 anti-mouse/human CD44 (IM7) | BioLegend | Cat. # 103030, RRID: AB_830787 |
| PerCP/Cy5.5 anti-mouse CD45 (30-F11) | BioLegend | Cat. # 103132, RRID: AB_893340 |
| APC/Cy7 anti-mouse CD45 (30-F11) | BioLegend | Cat. # 103116, RRID: AB_312981 |
| FITC anti-mouse TCRγδ (GL3) | BioLegend | Cat. # 118106, RRID: AB_313830 |
| Brilliant violet 421 anti-mouse TCRγδ (GL3) | BioLegend | Cat. # 118119, RRID: AB_10896753 |
| Brilliant violet 421 anti-mouse TCRβ (H-57) | BioLegend | Cat. # 109230, RRID: AB_2562562 |
| APC anti-mouse TCRβ (H-57) | BioLegend | Cat. # 109212, RRID: AB_313435 |
| Brilliant violet 605 anti-human/mouse/rat CD278 (ICOS) (C398.4A) | BioLegend | Cat. # 313538, RRID: AB_2687079 |
| Alexa Fluor 647 anti-human/mouse/rat CD278 (ICOS) (C398.4A) | BioLegend | Cat. # 313516, RRID: AB_2122582 |
| APC anti-mouse CD314 (NKG2D) (CX5) | BioLegend | Cat. # 130212, RRID: AB_1236372 |
| PE anti-mouse CD314 (NKG2D) (CX5) | BioLegend | Cat. # 130207, RRID: AB_1227713 |
| FITC anti-mouse CD314 (NKG2D) (C7) | BioLegend | Cat. # 115711, RRID: AB_2133291 |
| PE/Cy7 anti-mouse CD159a (NKG2AB6) (16A11) | BioLegend | Cat. # 142809, RRID: AB_2728160 |
| APC/Cy7 anti-mouse CD3ε (2C11) | BioLegend | Cat. # 100330, RRID: AB_1877170 |
| Brilliant violet 605 anti-mouse CD366 (Tim-3) (RMT3-23) | BioLegend | Cat. # 119721, RRID: AB_2616907 |
| PE anti-mouse CD137 antibody (17B5) | BioLegend | Cat. # 106106, RRID: AB_2287565 |
| FITC anti-mouse CD279 (PD-1) (29F.1A12) | BioLegend | Cat. # 135214, RRID: AB_10680238 |
| PE anti-mouse TIGIT mAb (GIGD7) | eBioscience | Cat. #12-9501-82, RRID: AB_11042152 |
| Purified rat IgG2b, κ isotype control (RTK4530) | BioLegend | Cat. # 400601, RRID: AB_326545 |
| PerCP-eFluor 710, CD278 (ICOS) Monoclonal Antibody [clone 7E.17G9] | eBioscience | Cat. # 46-9942-82, RRID: AB_2744728 |
| PE/Cy7 anti-mouse CD366 (Tim-3) [RMT3-23] | BioLegend | Cat. # 119716, RRID: AB_2571932 |
| APC anti-mouse TIGIT (Vstm3) [clone: 1G9] | BioLegend | Cat. # 142106, RRID: AB_10960139 |
| Alexa Fluor 700 anti-mouse CD5  [clone: 53-7.3] | BioLegend | Cat. # 100636, RRID: AB_2687001 |
| APC/Cy7 anti-mouse NK-1.1  [clone: PK136] | BioLegend | Cat. # 108724, RRID: AB_830871 |
| Brilliant Violet 510 anti-mouse CD69 [clone: H1.2F3] | BioLegend | Cat. # 104531, RRID: AB_2562326 |
| Brilliant Violet 570 anti-mouse TCR β [clone: H57-597] | BioLegend | Cat. # 109231, RRID: AB_10900242 |
| Brilliant Violet 605 anti-mouse CD103 [clone: 2E7] | BioLegend | Cat. # 121433, RRID: AB_2629724 |
| Brilliant Violet 650 anti-mouse CD223 (LAG-3) [clone: C9B7W] | BioLegend | Cat. # 125227, RRID: AB_2687209 |
| Brilliant Violet 711 anti-mouse CD107a (LAMP-1) | BioLegend | Cat. # 121631, RRID: AB_2783065 |
| Brilliant Violet 750 anti-mouse CD44 | BioLegend | Cat. # 103079, RRID: AB_2941373 |
| Brilliant Violet 785 anti-mouse CD27 | BioLegend | Cat. # 124241, RRID: AB_2800595 |
| BUV395 Rat Anti-Mouse CD45 [clone: 30-F11] | BD Biosciences | Cat. # 565967, RRID: AB_2739420 |
| DAPI Staining Solution | Miltenyi Biotec | Cat. # 130-111-570 |
| BUV661 anti-mouse CD122  [clone: 5H4] | BD Biosciences | Cat. # 741537, RRID: AB_2740112 |
| BUV737 anti-mouse Vγ2 (Vγ4) T-Cell Receptor | BD Biosciences | Cat. # 748998, RRID: AB_2740113 |
| BUV805 anti-mouse CD3 (17A2) | BD Biosciences | Cat. # 749276, RRID: AB_2740114 |
| PE anti-mouse CD122 (IL-2Rβ) [5H4] | BioLegend | Cat. # 105906, RRID: AB_2125736 |
| FITC anti-human TCR Vδ1 antibody, REAfinity | Miltenyi Biotec | Cat. # 130-120-442, RRID: AB_2752100 |
| APC anti-human TCR Vδ1 antibody, REAfinity | Miltenyi Biotec | Cat. # 130-118-968, RRID: AB_2733451 |
| FITC anti-human TCR Vδ2 antibody | BioLegend | Cat. # 331405, RRID: AB_1089231 |
| PE TCR Vδ2 Antibody, anti-human, REAfinity | Miltenyi Biotec | Cat. # 130-111-010 RRID: - |
| Pacific Blue™ anti-human CD45 Antibody | BioLegend | Cat. # 304029, RRID: AB_493564 |
| **Chemicals, peptides, and recombinant proteins** | | |
| Recombinant Mouse IL-18 (carrier-free) | BioLegend | Cat. # 767004 |
| Recombinant Mouse IL-12 | R&D Systems | Cat. # 419-ML-050 |
| Mouse IL-23 Recombinant Protein 10ug | eBioscience | Cat. # 14-8231-63 |
| [Recombinant Mouse IL-1 beta/IL-1F2 Protein](https://app.quartzy.com/groups/49865/inventory/27270768?query=IL-1&sort=-_score) | R&D Systems | Cat. # 401-ML-025 |
| FBS, heat inactivated | Gibco (Thermo Fisher Scientific) | Cat. # 10270106 |
| Penicillin-streptomycin | Sigma-Aldrich | Cat. # P4333 |
| RPMI 1640 | Gibco | Cat. # 21875-091 |
| LIVE/DEAD Fixable Blue Dead Cell Stain Kit | Thermo Fisher Scientific | Cat. # L34962 |
| Red Blood Cell Lysing Buffer Hybri-Max | Sigma-Aldrich | Cat. # R7757 |
| 4-OH tamoxifen | Sigma-Aldrich | Cat. # H7904 |
| Tamoxifen | Sigma-Aldrich | Cat. # T5648-5G |
| 10% neutral buffered formalin (NBF) | CellPath | Cat. # BAF-9000-08A |
| Trypsin from bovine pancreas | Sigma-Aldrich | Cat. # T1005 |
| DNase I from bovine pancreas | Sigma-Aldrich | Cat. # 11284932001 |
| Trypsin/EDTA solution | Gibco | Cat. # 25200-056 |
| HBSS | Thermo Fisher Scientific | Cat. # 14175095 |
| Collagenase type IV | Worthington | Cat. # LS004188 |
| DNAse I | Sigma-Aldrich | Cat. # D5025-15 |
| BSA | Sigma-Aldrich | Cat. # A4503 |
| Dispase II | Sigma-Aldrich | Cat. # D4693 |
| **Deposited data** | | |
| Mouse RNA-seq data | This paper | GEO: GSE277902 |
| Mouse ATAC-seq data | This paper | GEO: GSE277903 |
| Human RNA-seq data | This paper | GEO: GSE297713 |
| **Experimental models: organisms/strains** | | |
| Mouse: B6.129S-Tcrdtm1.1(Cre/ERT2)Zhu/J | The Francis Crick Institute | Cat. # JAX:031679, RRID: IMSR_JAX:031679 |
| Mouse: B6.129-Gt(ROSA)26Sortm1(Cre/ERT2)Tyj/J | The Francis Crick Institute | Cat. # JAX: 008463, RRID: IMSR_JAX:008463 |
| Mouse: Gt(ROSA)26Sortm4(ACTB-TdTomato,-EGFP)Luo/J | The Francis Crick Institute | Cat. # JAX: 007576, RRID: IMSR_JAX:007576 |
| **Software and algorithms** | | |
| ImageJ | Developer: Wayne Rasband (NIH) | https://imagej.nih.gov/ij/, RRID: SCR_003070 |
| GraphPad Prism version 8.0.2 | GraphPad Inc | RRID: SCR_002798 |
| FlowJo version 10 | BD | RRID: SCR_008520 |
| SpectroFlo | Cytek Biosciences | SpectroFlo® software (Cytek Biosciences, Fremont, CA, USA) |
| R (for bioinformatics analysis) | R Foundation for Statistical Computing | https://www.r-project.org/, RRID: SCR_001905 |

*APC, Antigen-presenting cell; Cy, cyanine; FITC, fluorescein isothiocyanate; PE, phycoerythrin; PerCP, peridinin chlorophyll protein; AF, Alexa Fluor; BV, Brilliant Violet; BUV, Brilliant Ultraviolet; DAPI, 4′,6-diamidino-2-phenylindole; GEO, Gene Expression Omnibus; RRID, Research Resource Identifier.APC, Antigen-presenting cell; Cy, cyanine; FITC, fluorescein isothiocyanate; PE, phycoerythrin; PerCP, peridinin chlorophyll protein; AF, Alexa Fluor; BV, Brilliant Violet; BUV, Brilliant Ultraviolet; DAPI, 4′,6-diamidino-2-phenylindole; GEO, Gene Expression Omnibus; RRID, Research Resource Identifier.

#### **BD: BD Biosciences (US); BioLegend: BioLegend (US); eBioscience: Thermo Fisher Scientific (UK); Thermo Fisher: Thermo Fisher Scientific (US); Worthington: Worthington Biochemical Corporation (US); Peprotech: PeproTech, Inc. (Rocky Hill, NJ, US); ImmunoTools: ImmunoTools GmbH (Gladiolenweg, Germany); Corning: Corning Inc. (US); Miltenyi Biotec: Miltenyi Biotec GmbH (Germany); Sigma-Aldrich: Sigma-Aldrich (US); R&D Systems: R&D Systems, Inc. (US); Jackson Laboratory: The Jackson Laboratory (US); Cytek Biosciences: Cytek Biosciences (Fremont, CA, US); Gibco: Gibco, a brand of Thermo Fisher Scientific (US).

#### **Humans**

***Generation of human γδ T-cell lines***

Peripheral blood mononuclear cells (PBMC) from healthy donors were isolated by centrifugation on a Ficoll-Paque PLUS (GE Healthcare, Little Chalfont, United Kingdom) gradient. Cells were stained with an anti TCR V delta 1 Monoclonal Antibody (TS8.2 clone from Invitrogen, Waltham, Mass) and Vδ1+ cells isolated by fluorescence-activated cell sorting (FACS)-sorting with a FACSAria Fusion flow cytometer (BD Biosciences) at Flow Cytometry Facilities at Centro de Investigaciones Biológicas-Margarita Salas (Madrid, Spain). First, polyclonal Vδ1+ cells were stimulated at day 0 with 1 mg/mL Phytohemagglutinin-L (PHA-L) from Phaseolus vulgaris (Sigma-Aldrich, St Louis, Mo), and cocultured with irradiated allogeneic feeder cells weekly (PBMC and Epstein Barr Virus-transformed B cells, 40 and 65 Gy, respectively) at 1:2 ratio in Iscove’s Modified Dulbecco’s Medium (IMDM) (GE Healthcare) supplemented with 40 IU/mL recombinant human IL-2, 10% AB+ human serum, and 1% L-glutamine and Antibiotic-Antimycotic (Life Technologies, Carlsbad, Calif). After 3 weeks of allogeneic stimuli, 0,7 million expanded Vδ1+ cells were stimulated with 10 μg/mL PHA-L (only at day 0) for 24 hours and co-cultured with irradiated (150 Gy) HTLV-1-producing cell line (MT2) at 1:1 ratio in RPMI 1640 medium from Lonza (Basel, Switzerland), supplemented with 100 IU/mL recombinant interleukin-2 (rIL-2), 10% fetal bovine serum and 1% L-glutamine and antibiotics-antimycotic. After 4 weeks, cell lines phenotype was checked to be exclusively Vδ1+ cells by flow cytometry with a FACSCelesta flow cytometer (BD Biosciences) at the Center for Cytometry and Fluorescence Microscopy of Complutense University of Madrid (Spain).

#### **CRISPR RNP nucleofection and TCR deletion**

### Human blood HTLV1-immortalized Vδ1+ were cultured in complete RPMI medium containing 10% FBS and 100 U mL-1 of rhIL-2 (PeproTech, Cat. # 200-02) and subjected to CRISPR to delete *TRDV1* gene using a modified protocol previously published2. *TRDV1* gene was independently targeted by two different custom-designed gRNAs (5'-CATCAGAACCCTGGCGAATA-3', 5'-ACCACCAACTTGTTTCATAC-3') synthetized by IDT. In brief, Cas9 RNPs were assembled by complexing two-component 40 μM gRNA (crRNA:tracrRNA) with 13 μM Cas9-GFP nuclease (IDT, Cat. # 10008100) to form an RNP at 20 μM immediately before experiments. Nucleofection was carried out on 1x106 cells with 3 μL of Cas9 RNP and P3 buffer (Lonza, Cat. # V4XP-3032) in a total of 20 μL per reaction using the Lonza Nucleofection system with pulse code EH100. Immediately after nucleofection, 80 μL of pre-warmed RPMI medium without Pen/Strep was added directly to the cells in the nucleofection cuvettes and were rested for 10 min at 37°C. After 10 min, cells were transferred to 48-well cell culture plates and incubated overnight at 37° C, 5% CO2 in RPMI medium containing 100 U mL-1 of rhIL-2 but without Pen/Strep. After 24 hours, cells were sorted based on GFP signal using BD FACS Aria III Cell Sorter (BD) to enrich for transfected GFP+ cells and returned to culture. Following 10 days, *TRDV1* knock-out efficiency was determined by flow cytometry with TCR Vδ1 antibody (Miltenyi Biotec, Cat. # 130-118-968) using the BD LSR Fortessa instrument (BD).

### **Experimental Mouse protocols**

#### **Conditional Cγ1 deletion**

To induce conditional deletion of *Cγ1*, *Cγ1^flox^* mice were crossed with two different lines expressing tamoxifen-inducible Cre recombinase (*Cre-ERT2*). *TCRδ^Cre-ERT2^* mice were used for *Cγ1* deletion specifically in dermal and epidermal γδ T cells, while *Rosa26^Cre-ERT2^* mice allowed for ubiquitous deletion upon tamoxifen administration including the gut. Experimental mice received tamoxifen (TAM) for 7 days, by intraperitoneal (ip) injection. Following treatment, epidermis and dermis samples were collected from *TCRδ^Cre-ERT2^* mice, while intraepithelial lymphocytes (IELs) were isolated from *Rosa26^Cre-ERT2^* mice for further analysis.

#### **Epidermal cells isolation**

Whole trunk epidermis was separated from the dermis by incubating skin samples in 2 mg/mL Dispase II at 37° C for 2 hours3. Following incubation, the epidermal sheets were carefully peeled off and digested with 0.1 mg/mL of DNase I at 37° C for 15 min shaking at 230 rpm to obtain single-cell suspensions for subsequent analysis.

#### **Dermal cells isolation**

#### After epidermis separation, dermis tissue was finely minced with scissors and incubated at 37° C for 1 hour with shaking at 700 rpm on a thermoblock in digestion solution containing 2.7 mg/ml collagenase XI, 0.25 mg hyaluronidase, and 0.1mg/ml DNase I in RPMI with 1X HEPES. Digested tissue was then filtered through a 30 μm filter cone (CellTrics 30 μm Cat# 04-0042-2316, Sysmex) into a new tube for subsequent analysis.

#### **Isolation of mouse intestinal IEL**

Mouse IEL were isolated from small intestine4. Briefly, small intestine was opened, washed in PBS, cut into 0.5-cm long pieces and incubated at room temperature in complete RPMI supplemented with 1 mM DTT. Tissues were then subjected to two rounds of washes with complete RPMI, vortex and filtered through 70 μm cell strainers. IEL fraction was then purified by Percoll density gradient (80:40:20) centrifugation and stained by flow cytometry.

#### **Isolation of primary DETC lines (short-term DETC)**

Primary DETCs were isolated and grown as previously described5. After approximately 1 month, cells were assessed for purity by flow cytometry. Cell lines with ≥85% DETCs were used for experiments.

***TEWL measurement***

Under inhalation anaesthesia, TEWL of the ear pinnae was measured using a Tewameter TM300 probe (Ck Electronic) under constant temperature and humidity conditions. Values were recorded as the average of ten consecutive measurements once readings were stabilized using MPA software (Ck Electronic).

***UVR model***

Under inhalation anaesthesia, mice were positioned under a cardboard box, and one or both ears were exposed and fixed flat using Blu-Tac. UVB radiation (302 nm) was administered to dorsal ear skin for a dose of 45 mJ cm–2 (C57BL/6) using an XX-15 Series UV bench lamp (UVP) mounted on a Perspex and plastic housing.

***Ear swelling measurement***

Total ear thickness was calculated as the average of three measurements of the ear pinna with a micrometer (Mitutoyo) after discarding the first measurement.

#### **IMQ-induced psoriasis**

To induce psoriasis, ears were treated daily with 5 mg Aldara cream (5% IMQ) per ear for seven consecutive days. Ear thickness was measured starting 1 day before the first treatment (day 0) and set to 100%. Ear thickness was measured using a calliper. Reddening and scaling were evaluated daily and scored. Reddening and scaling were assessed separately to calculate an average cumulative disease score. For treatment, mice were anesthetized with isoflurane.

#### **Subcutaneous Inoculation of B16 Melanoma Cells**

For B16 melanoma inoculation, animals were placed individually in an induction chamber and anesthetized with 5% isoflurane (Isoflo, Zoetis, UK) in 100% oxygen at a flow rate of 5 L/min until the loss of the righting reflex. Lubricating eye gel (Lubrithal Eye Gel 10G Tube) was applied to prevent corneal drying.

The injection site, typically the right flank, was shaved using a Wella razor and cleaned with 70% ethanol. B16 melanoma cells were harvested by washing with PBS, incubating at 37°C for 5 min with 0.25% trypsin/EDTA solution (Sigma), and washed with Hanks' balanced saline solution (HBSS).

For subcutaneous inoculation, B16.F10 cells (1×106) were suspended in 100 μL of PBS and injected subcutaneously using a 27G needle into the flank region. Mice were observed for 5–10 minutes post-injection to ensure proper distribution of the suspension and were then returned to their cages. Developing tumours were measured using a digital calliper at regular intervals. Tumor growth and health status were monitored according to institutional ethical guidelines.

### **Experimental Techniques**

#### **Flow cytometry**

To analyse γδ T cell populations, separate tissue-specific cell suspensions were prepared as described before from ears or back skin or gut of individual animals. γδ T cell were blocked with normal hamster IgG plus anti-FcR (2.4G2) and stained with specific antibodies (Table 3). Isotype-matched control antibodies were used at the same concentrations as [test antibodies](https://www.sciencedirect.com/topics/medicine-and-dentistry/immunoassay). Analysis was performed with a LSR Fortessa (BD Biosciences) with electronic gates set on live cells by a combination of forward and side light scatter and viability dye exclusion. A minimum of 1000 live events was collected per sample and data were analysed with [FlowJo](https://www.sciencedirect.com/topics/medicine-and-dentistry/sequest" \o "Learn more about FlowJo from ScienceDirect's AI-generated Topic Pages) software (BD, Franklin Lakes, NJ).

For spectral analysis flow cytometry was performed using a Spectral Aurora flow cytometer (Cytek Biosciences, 5-laser system), capable of full-spectrum detection across UV (355 nm), Violet (405 nm), Blue (488 nm), Yellow-Green (561 nm), and Red (640 nm) lasers. Fluorescence signals were recorded using the Cytek SpectroFlo software. Single-stained controls were included for spectral unmixing, using either compensation beads (UltraComp eBeads, Thermo Fisher) or cells. Negative and fluorescence-minus-one (FMO) controls were included to define gating strategies. Data were acquired with gating performed on live, singlet populations based on FSC-A vs. FSC-H and viability dye exclusion. Dimensionality reduction techniques, including t-distributed stochastic neighbour embedding (t-SNE) were applied to visualize high-dimensional datasets using FlowJo v10 (BD Biosciences).

#### **FACS sorting for bulk RNA-seq and ATAC-seq**

To isolate mouse γδ T cell populations, separated tissue-specific cell suspensions were prepared as described before, incubated with antibodies for 30 min at 4°C in FACS buffer (0.5% FBS, 2 mM EDTA in PBS, pH 7.4), then washed twice in FACS buffer. Viable γδ T cell cells were sorted into PBS buffer + 0.04% BSA and retained on ice. Human HTLV1-immortalized Vδ1+were stained with TCR Vδ1 antibody (Miltenyi Biotec, Cat. # 130-118-968) and sorted into TCR+ and TCRneg cells. Sorted cells were confirmed to be >85% to 95% pure prior to RNA extraction.

#### **Bulk RNA-seq**

cDNA was prepared from 10 ng input RNA using the NuGEN Ovation RNA-Seq System (V2; Manchester, United Kingdom), and libraries constructed using the NuGEN Ultralow Library System V2. Both these steps followed the manufacturer’s instructions. The resulting libraries were pooled for sequencing on an Illumina HiSeq 2500 platform (San Diego, Calif) with single-ended 75-bp reads. 

#### **Bulk ATAC-seq**

#### ATAC-seq samples were prepared using the ATAC-seq Kit from Active Motif (Cat. # 53150) following manufacturer’s instructions. For each sample, 50 000 cells were lysed in ice-cold ATAC Lysis Buffer and immediately spin down at 500 g for 10 min at 4°C. After supernatant removal, nuclei were resuspended in tagmentation master mix and incubated at 37° C for 30 min while shaking at 800 rpm. Tagmentation reaction was stopped by addition of DNA Purification Binding buffer (Active Motif). Tagmented DNA fragments were purified and eluted in 35 μl of DNA Elution buffer (Active Motif), which were then amplified in a 50 μl PCR reaction using standard ATAC PCR conditions: 72 °C for 5 min; 98 °C for 30 sec and thermocycling at 98 °C for 10 sec, 63 °C for 30 sec and 72 °C for 1 min for 10 cycles. Each 50 μl PCR reaction contained of 33.5 μl Tagmented DNA, 1 μl dNTPs (10 mM), 10 μl Q5 Reaction Buffer (5X), 0.5 μl of Q5 High-Fidelity Polymerase (2 U/μl), 2.5 μl Nextera i5 Indexed primer (25 μM) and 2.5 μl Nextera i7 Indexed primer (25 μM) (Illumina). Following amplification, ATAC-seq libraries were cleaned up using 60 μl of SPRI bead solution (1.2 X the sample volume) and two 80% ethanol washes while being placed on a magnetic rack stand before being eluted in 20 μl DNA Purification Elution Buffer (Active Motif). All ATAC-seq libraries were examined on the TapeStation (Agilent) before sequenced on the NovaSeq 6000 system (Illumina), with paired-end read lengths of 50 bp and at least 50 million uniquely mapped reads per sample.

#### **Bulk RNA-seq bioinformatic analysis**

***Reads alignment and quantification:*** Raw reads were processed using the publicly available nf-core6 RNAseq pipeline v3.3 with the STAR6 / RSEM7 against mouse genome assembly GRCm38 and Ensembl transcript annotation release 95. Gene-level RSEM abundance estimates were imported into R (version 4.4.3) using the DESeq2 1.46.0 package8. Normalization factors were calculated using the default DESeq function and VST normalized counts were generated for downstream analyses. Experimental batch effect was removed using limma 3.62.2 package. Principal Component Analysis (PCA) was performed with VST normalized counts using plotPCA function from DESeq2.

***Differential gene expression analysis:*** Differential gene expression analysis based on the negative binomial distribution with Wald test between different genotypes was performed for each dataset using the DESeq function from DESeq2 1.46.0 package. Significance was determined by adjusted P value < 0.05 and a base mean > 10. A combined list of significantly differentially expressed genes from all pairwise comparisons was created and used to identify the number of genes upregulated (log2 fold change > 0) and downregulated (log2 fold change < 0), and to generate heatmaps comparing VST normalized counts across samples with Euclidean distance clustering using the pheatmap 1.0.12 package.

***Gene Set Enrichment Analysis (GSEA):*** GSEA was performed using the fgsea 1.32.2 package9. The analysis was performed on a ranked gene list generated using their level of differential expression (P value) and their log2 fold change to score magnitude and direction of change. Gene sets were retrieved from the Molecular Signatures Database (MSigDB) using their mouse and human Hallmarks collections with the msigdbr 10.0.1package [https://igordot.github.io/msigdbr/]. Additional R packages used for data analysis and plotting include tidyverse 2.0.0, org.Mm.eg.db 3.20.0, ggrepel 0.9.6, magrittr 2.0.3, ggplot2 3.5.1, and RcolorBrewer 1.1-3.

#### **Bulk ATAC-seq bioinformatic analysis**

***Read Alignment and Peak Calling:*** Sequencing reads were processed using the nf-core ATAC-seq pipeline (v2.1.2)6, aligned to the mouse reference genome (mm10), and filtered using the ENCODE blacklist to exclude artefactual regions. Peak calling was performed with MACS2 in broad peak mode. Genotype-specific peak intersections were computed using bedtools intersect (v2.30.0), requiring a minimum of 50% reciprocal overlap between peaks. A peak was only considered to be genuine if present in all biological replicates for each genotype per organ group. Read counting was performed using featureCounts (v2.0.3) with --fracOverlap 0.2.

***Differential Accessibility Analysis:*** Read counts were imported into R 4.4.1 and filtered to include only standard chromosomes. GC content bias was addressed using the EDASeq package10, employing full quantile normalization within and between lanes. Offsets incorporating both library size and GC content were used in a negative binomial generalized linear model framework implemented via edgeR. Differential accessibility was assessed with a likelihood ratio test. Peaks with an FDR < 0.05 were considered significantly differentially accessible.

***Peak annotation and functional analysis:*** Differentially accessible ATAC-seq peaks were annotated using the ChIPseeker package11 with gene models from Ensembl (mm10). Peaks were assigned to the nearest gene using a ±3 kb window around transcription start sites (TSS). Functional enrichment of genes associated with annotated peaks was performed using clusterProfiler12 and Gene Ontology (GO) pathway databases. Separate enrichment analyses were conducted for upregulated and downregulated peaks identified through differential accessibility testing (FDR < 0.05).

***Motif enrichment analysis:*** Motif enrichment analysis was performed using HOMER’s findMotifsGenome.pl tool13. Differentially accessible peaks between WT and KO samples (FDR < 0.05) were used as input and motifs were searched within ±100 bp (200 bp window) around the peak centres. The mouse genome (mm10) was used as reference with repeat-masking enabled.

***Genome browser data visualization:*** Genome browser tracks were generated with bigwig coverage files from RNA-seq and ATAC-seq data and bed files for ATAC-seq peaks initially visualized with Integrative Genomics Viewer (IGV) and finally plotted using the ggbio 1.54.0 package with EnsDb.Mmusculus.v79 2.99.0 as gene database.

#### **Ultra-low input Mass spectrometry Proteomic analysis**

Epidermal sorted γδ T cells were lysed in 30 µL mild lysis buffer (50mM Tris pH:8, 100mM KCL, 0.2% triton) and 30 µL harsh lysis buffer (100 mM TEAB, 5% SDS). Samples were then sonicated and reduced using 50 mM DTT and incubated at 45 °C for 10 min. Samples were then incubated at room temperature for 5 min with 10 mM Iodoacetamide. For trypsin digestion, the PROTIFI S-Trap™ system was utilized using the S-Trap™ Micro Columns (PROTIFI, Cat. # C02-micro-80) according to the manufacturer’s instructions. In brief, 5 µL of 55% phosphoric acid was added to all samples. 165 µL of 100 mM TEAB-MeOH Binding Buffer was added to one S-Trap™ Micro Column per sample. Afterwards, the whole sample mixtures were added on top of the Binding Buffer in the Micro Columns and centrifuged for 1 min at 500 g to precipitate samples on top of the S-Trap matrix. Samples were then washed four times by adding additional 165 µL of Binding Buffer to each column, centrifuged for 1 min at 500 g and discarding the flowthrough. Columns were transferred to fresh 1.5 mL Eppendorf Protein LoBind Tubes. A total of 45 µL of Digestion Buffer containing 2 mg Trypsin in TEAB was added to each column. Column in collection tubes were incubated at 45 °C for 5 hours. Following trypsin digestion, peptides were eluted from the columns using different elution buffers. First, 40 µL of Elution Buffer 1 (50 mM TEAB in H2O) was added and columns were centrifuged for 1 min at 350 g to elute peptides generally. Second, 40 µL of Elution Buffer 2 (0.1% formic acid) was added and columns were centrifuged for 1 min at 350 g to elute acidic peptides specifically. Finally, 40 µL of Elution Buffer 3 (50% acetonitrile, 0.1% formic acid) was added and columns were centrifuged for 1 min at 350 g to elute hydrophobic peptides specifically. All elution fractions were combined into the same collection tube. Samples were frozen in dry ice and dried overnight using the Labconco™ CentriVap Cold Trap at -4 °C to remove any residual acetonitrile from the samples. Samples were resuspended in 0.1 % formic acid for sample loading and mass spectrometry. Evotip Pure C18 trap columns (EVOSEP, Cat. # EV2011) were used for sample loading, according to the manufacturer’s instructions, loading approximately 200 ng of peptides per sample. Data was aquired using TIMS TOF Pro2 by Bruker, coupled to Evosep One LC system. For the Liquid Chromatography (LC) separation, the standard 60SPD 2.3 method was used, and separation was performed using EV-1109 column, heated at 40° C during analyses. TIMS TOF Pro2 was operated in DIA PASEF mode, scan width was set to 100-1700 m/z with the IM 1K/0 0.6 - 1.6, ramp and accumulation time was locked at 100 ms.

#### **Proteomic bioinformatic analysis**

Following acquisition, raw data was processed using Spectronaut 19.514 .For peptide identification, followed by protein identity allocation, the mouse UniProt database was used by Spectronaut. The intensity data was normalized using cross-run local normalization, which is based on a retention time dependent local regression model described in Callister et al. 2006. The data was exported to a .tsv file, followed by a custom R script for further analysis using RStudio 2024.04.2+764 with R 4.4.1. All P values were calculated using Welch’s t-test. P Values were adjusted using the Benjamini-Hochberg method to adjust for multiple testing and false discovery rate. Batch correction was performed in R with the limma version 3.62.1 package.

#### **In vitro stimulation assays**

For analysis of *in vitro* production of IFNγ and IL-17 by intracellular flow cytometry, tissue-specific γδ T cells were purified after tissue preparations by FACS as describe above and were then cultured in complete RPMI medium and stimulated for 5 hours with 25 ng/ml phorbol 12-myristate 13-acetate (PMA) and 1 µg/ml Ionomycin in the presence of 10 µg/ml brefeldin A (BFA) at 37° C, 5% CO2. PMA, Ionomycin and BFA were all purchased from Sigma. For cytokine stimulation, sorted cells were stimulated in complete RPMI with IL-1β (10 ng/ml) plus IL-23 (50 ng/ml) or with IL-12 (100 ng/ml) plus IL-18 (100 ng/ml) for 21 hours. BFA (10 µg/ml) was added for the final 5 h, and production of IFN-γ or IL-17A was immediately assessed by intracellular cytometry. IL-1β, IL-23, IL-12 and IL-18 were purchased from R&D and resuspended following manufacturer’s instructions.

#### **Quantitative RT-PCR**

Epidermis from back skin was separated from dermis as described in the flow cytometry section. To isolate specific epidermal γδ T cell populations, cell suspensions were prepared as described in the FACS sorting section. Samples were directly frozen in RLT buffer prior to RNA purification with DNase digest (RNeasy kit; QIAGEN, Venlo, The Netherlands). cDNA was generated using Superscript-II (Invitrogen, Thermo Fisher Scientific) and analysed using SYBR-green assay (Invitrogen) using a Viaa7 Real-time PCR machine (Applied Biosystems, Thermo Fisher Scientific). cDNA was analysed for TCR related genes, and the expression levels of each gene were normalized to *Cyclophilin A*.

#### **NanoString**

γδ TCR and γδ X T cells were sorted using FACS from dermis or gut preparations. Cells were sorted into R10 medium at 4 °C and subsequently pelleted and lysed using the RLT lysis buffer (QIAGEN). Lysates from an average of approximately 50,000 cells per sorted population were hybridized to the nCounter® PanCancer Immune Profiling Panel to profile 770 human genes at 65 °C overnight (NanoString Technologies). Hybridized samples were processed on an nCounter Prep Station and data were collected on an nCounter Digital Analyzer (NanoString Technologies), according to the manufacturer’s instructions. Raw data were imported into nSolver v.4.0 (NanoString Technologies) for data quality checks, background thresholding, scaling and normalization. Raw counts were scaled based on the geometric mean of all positive control probes. Gene expression normalization (normalized counts) was performed relative to the geometric mean of all housekeeping genes included in the panel. The lower limit of detection was set at a normalized count of 20, which encompassed all negative control reference probes. All samples passed the default nSolver v.4.0 quality checks after this process. Normalized counts were used for all subsequent analyses. Differential gene expression analyses were restricted to paired samples.

#### **Confocal microscopy**

Whole depilated split ear sheets were flattened in a histology cassette and fixed with 10% neutral buffered formalin for 2 h at room temperature and permeabilized in 0.5% Triton X-100 for at least 1 h at room temperature. The epidermal sheets were blocked with PBS containing 5% normal goat serum and stained for 1 hour with antibodies at room temperature in PBS containing 5% normal goat serum and 0.5% BSA. z-sections were acquired on a Leica SP5 confocal microscope (Leica Microsystems, Deerfield, Ill) using a 10×/1.25 numerical aperture objective and processed and analysed using Fiji15. For quantitative analysis, confocal records were processed to identify cells using Otsu's automated thresholding and multiresolution segmentation in Definiens Developer XD software (Munich, Germany). Morphological parameter sphericity was calculated as the ratio of cell object border length to its volume, ranging from 0 to 1 with higher values corresponding to more spherical objects.

#### **Metabolic analysis**

Real-time metabolic profiling was carried out using the Seahorse Extracellular Flux Analyser system (Agilent) as previously described16 .In brief, human Vδ1 cells were seeded at a density of 100,000 cells/well in poly-D-lysine pre-coated Seahorse XFe96plates in XF assay buffer (Agilent) and centrifuged at 400 g for 5 min to settle cells. Plates were then allowed to equilibrate at 37° C in a non-CO2 incubator for 30 min. Mitochondrial function was assessed by measurement of oxygen consumption rate (OCR) and extracellular acidification rate (ECAR) under basal conditions and after sequential injection of 1 μM oligomycin, 1.5 μM Fluoro-carbonyl cynade phenylhydrazon (FCCP), 100 nM rotenone and 1 μM antimycin A. To assess contribution of fatty acid oxidation (FAO) to basal mitochondrial oxygen consumption, 300 μM etomoxir was injected in port A prior to injections of 1 μM oligomycin, 1.5 μM FCCP, 100 nM rotenone and 1 μM antimycin A. Data was acquired using the Seahorse XFe96 Extracellular Flux Analyzer and Wave software (Agilent) following manufacturer recommended settings and plotted using Prism version 10 software (GraphPad Software).

### **Normalization and statistical analysis**

When indicated in each experiment, every value was divided by the average value of the normal control condition. This process of division allowed us to normalize the data and compare it across different experiments. After normalizing the values, we combined or pooled the data from different experiments.

Groups were compared with Prism version 10 software (GraphPad Software, San Diego, Calif) using the 2-tailed unpaired Student t-test for comparison of 2 groups or 1-way ANOVA for comparison of 3 groups. Data are presented as each data point and mean or mean ± SD. P < 0.05 was considered significant. The experiments were not randomized, and the investigators were not blinded to allocation during experiments and outcome assessment. No statistical methods were used to predetermine sample size. All experiments were performed at least twice, either with similar results obtained and representative data shown, or with pooled data shown. Graph bars with pooled data from multiple experiments include all experiments performed. Where representative histograms are shown, data reflect ≥2 independent experiments with ≥3 mice per experiment, in which similar results were obtained.

1 Kaneko, T. Genome Editing in Mouse and Rat by Electroporation. *Methods Mol Biol* **1630**, 81-89 (2017). <https://doi.org:10.1007/978-1-4939-7128-2_7>

2 Moosmann, C., Muller, T. R., Busch, D. H. & Schober, K. Orthotopic T-cell receptor replacement in primary human T cells using CRISPR-Cas9-mediated homology-directed repair. *STAR Protoc* **3**, 101031 (2022). <https://doi.org:10.1016/j.xpro.2021.101031>

3 Mallick-Wood, C. A. *et al.* Conservation of T cell receptor conformation in epidermal gammadelta cells with disrupted primary Vgamma gene usage. *Science* **279**, 1729-1733 (1998). <https://doi.org:10.1126/science.279.5357.1729>

4 Turchinovich, G. & Hayday, A. C. Skint-1 identifies a common molecular mechanism for the development of interferon-gamma-secreting versus interleukin-17-secreting gammadelta T cells. *Immunity* **35**, 59-68 (2011). <https://doi.org:10.1016/j.immuni.2011.04.018>

5 Witherden, D. A. *et al.* The junctional adhesion molecule JAML is a costimulatory receptor for epithelial gammadelta T cell activation. *Science* **329**, 1205-1210 (2010). <https://doi.org:10.1126/science.1192698>

6 Ewels, P. A. *et al.* The nf-core framework for community-curated bioinformatics pipelines. *Nat Biotechnol* **38**, 276-278 (2020). <https://doi.org:10.1038/s41587-020-0439-x>

7 Li, B. & Dewey, C. N. RSEM: accurate transcript quantification from RNA-Seq data with or without a reference genome. *BMC Bioinformatics* **12**, 323 (2011). <https://doi.org:10.1186/1471-2105-12-323>

8 Love, M. I., Huber, W. & Anders, S. Moderated estimation of fold change and dispersion for RNA-seq data with DESeq2. *Genome Biol* **15**, 550 (2014). <https://doi.org:10.1186/s13059-014-0550-8>

9 Sergushichev, A. A. Analysis of the data was done using the fgsea package. *bioRxiv* **v1.16.0** (2016).

10 Risso, D., Schwartz, K., Sherlock, G. & Dudoit, S. GC-content normalization for RNA-Seq data. *BMC Bioinformatics* **12**, 480 (2011). <https://doi.org:10.1186/1471-2105-12-480>

11 Yu, G., Wang, L. G. & He, Q. Y. ChIPseeker: an R/Bioconductor package for ChIP peak annotation, comparison and visualization. *Bioinformatics* **31**, 2382-2383 (2015). <https://doi.org:10.1093/bioinformatics/btv145>

12 Wu, T. *et al.* clusterProfiler 4.0: A universal enrichment tool for interpreting omics data. *Innovation (Camb)* **2**, 100141 (2021). <https://doi.org:10.1016/j.xinn.2021.100141>

13 HOMER (Hypergeometric Optimization of Motif EnRichment) (RRID:SCR_010881)

14 Bruderer, R. *et al.* Extending the limits of quantitative proteome profiling with data-independent acquisition and application to acetaminophen-treated three-dimensional liver microtissues. *Mol Cell Proteomics* **14**, 1400-1410 (2015). <https://doi.org:10.1074/mcp.M114.044305>

15 Schindelin, J. *et al.* Fiji: an open-source platform for biological-image analysis. *Nat Methods* **9**, 676-682 (2012). <https://doi.org:10.1038/nmeth.2019>

16 van der Windt, G. J. W., Chang, C. H. & Pearce, E. L. Measuring Bioenergetics in T Cells Using a Seahorse Extracellular Flux Analyzer. *Curr Protoc Immunol* **113**, 3 16B 11-13 16B 14 (2016). <https://doi.org:10.1002/0471142735.im0316bs113>
