# Supplementary material for: T cell receptor γδ is a critical, real-time determinant of unique tissue surveillance mechanisms
Source: Research Square preprint supplement (doi:10.21203/rs.3.rs-6803702/v1), 2025-06-24
Supplement: Supplementary file 3 [file c0ad3d8f79e9dc43142d0547.docx]

Supplementary Table 2:

Cross-tissue concordant regulation of DEG in GSEA gene sets significantly enriched following TCR deletion.

**Mitotic spindle genes concordantly regulated in dermal and epidermal γδX cells:**

|  | Epidermis | Dermis |
| --- | --- | --- |
| *Sptb* | up | up |
| *Clasp2* | up | up* |
| *Ccdc88c* | up | up |
| *Arhgef2* | up | up |
| *Rasa2* | down | down |
| *Ywhae* | down | down |

**Metabolic genes concordantly regulated in dermal and intestinal γδX cells:**

|  | Intestine | Dermis* |
| --- | --- | --- |
| *Ndufb4c* | down | down |
| *Ndufa6* | down | down |
| *Ndufa7* | down | down |
| *Ndufa9* | down | down |
| *Ndufb2* | down | down |
| *Ndufc2* | down | down |
| *Ndufs2* | down | down |
| *Mdh1* | down | down |
| *Atp6vle1* | down | down |
| *Acat1* | down | down |
| *Hsd17b10* | down | down |
| *Mrpl15* | down | down |
| *Diat* | up | up |

**Metabolic genes concordantly regulated in dermal and human Vδ1 TCR KO cells:**

|  | Dermis | Human |
| --- | --- | --- |
| *CPT1A* | up | up |
| *MFN2* | up | up |
| *CPOX* | down | down |
| *ACAT2* | down | down |
| *FASN* | up | up |

* = with one outlier; DEG = differentially expressed genes; GSEA = Gene Set Enrichment Analysis.
